# Supplementary material for: Perception of solar UV radiation by plants: photoreceptors and mechanisms
Source: PubMed Central journal article supplement (PMC8260113; doi:10.1093/plphys/kiab162), 2021-04-07
Supplement: kiab162_supplementary_data.pdf [file kiab162_supplementary_data.pdf]

CA: filtered with cellulose acetate 0.115 mm

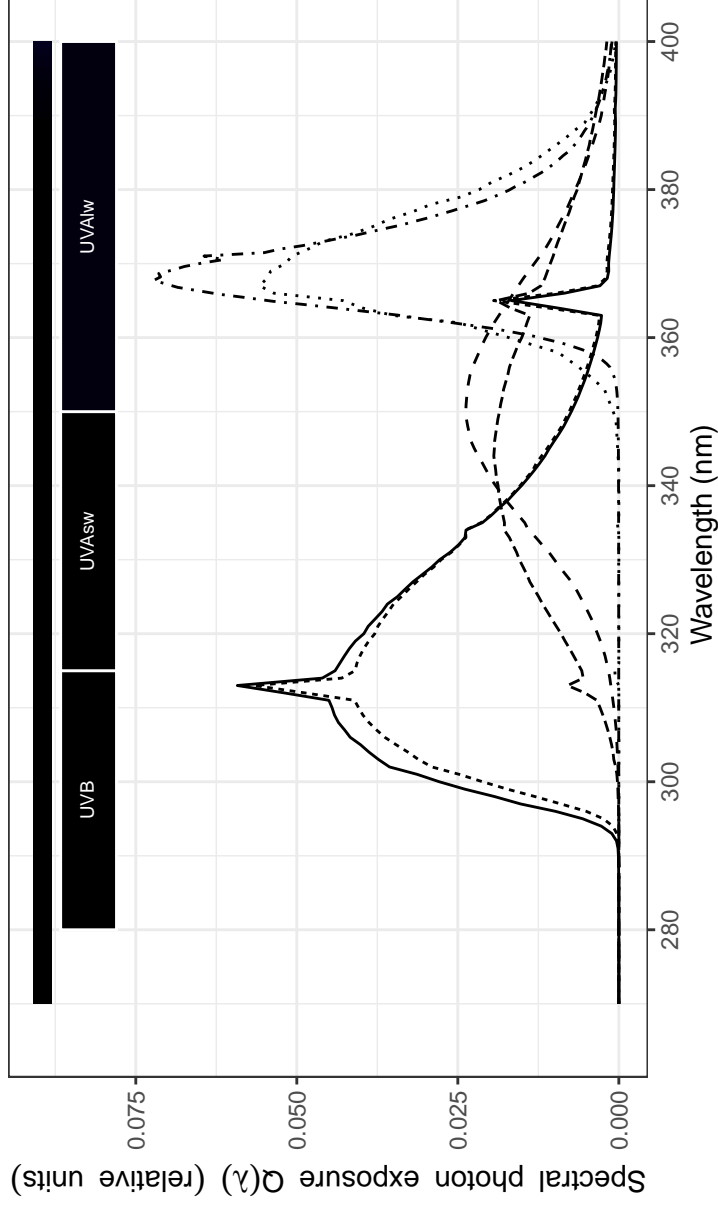

NF: not filtered

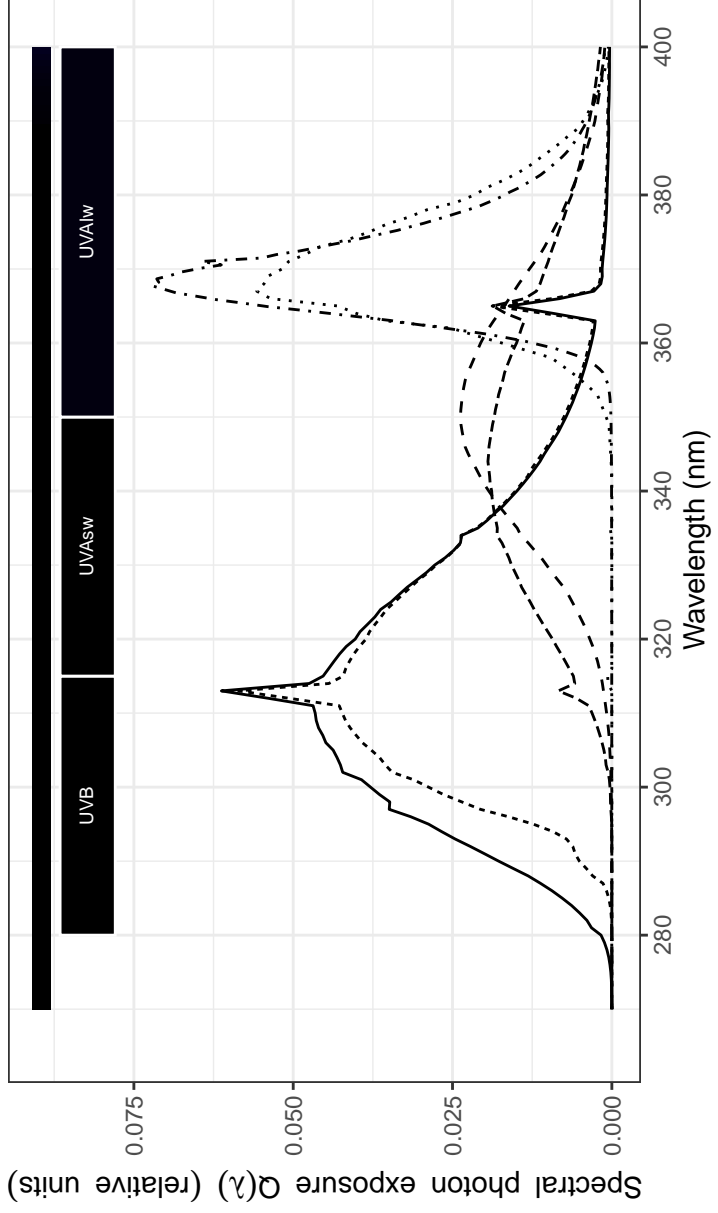

PET: filtered with polyester 0.125 mm

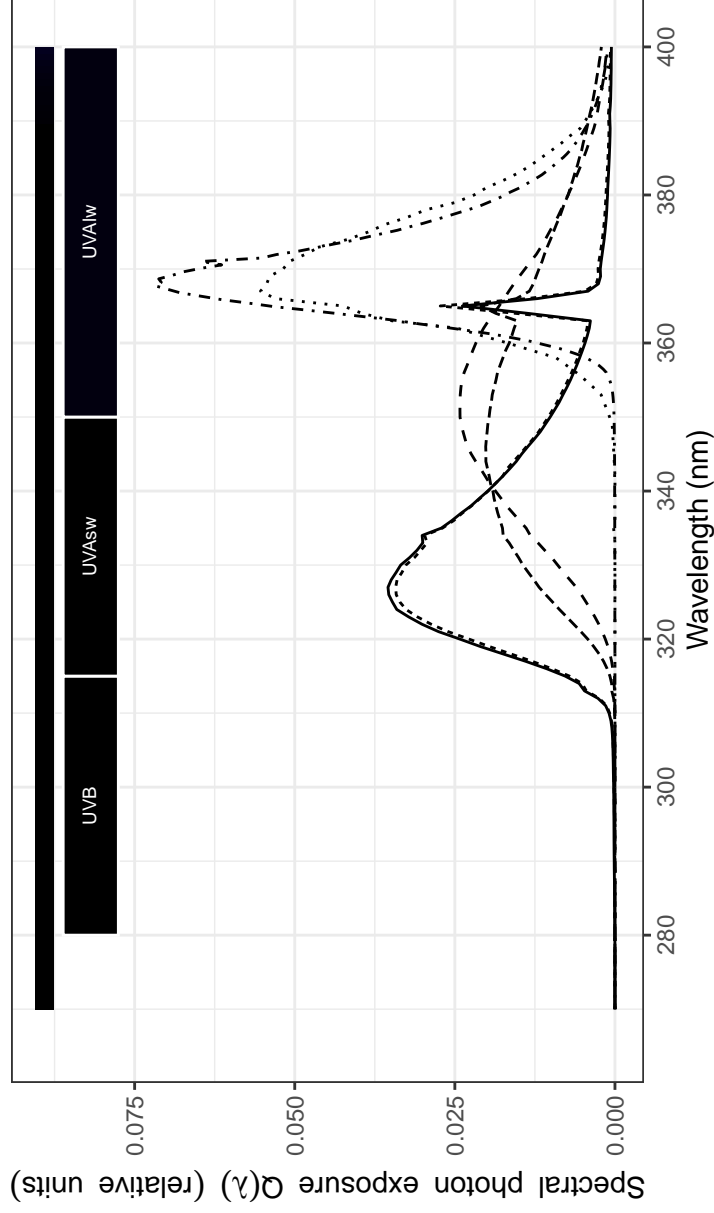

Lamp — FL UVB 313 nm P - - - FL UVA 340 nm ···· FL UVA 368 nm  
 ···· FL UVB 313 nm Q - - FL UVA 350 nm ···· LED UVA 365 nm

### Supplemental Data

| Filter | Lamp            | UV(<293nm) | UVB | UVA | UVA <sub>sw</sub> | UVA <sub>lw</sub> |
|--------|-----------------|------------|-----|-----|-------------------|-------------------|
| NF     | FL UVB 313 nm P | 7          | 51  | 48  | 43                | 6                 |
| NF     | FL UVB 313 nm Q | 2          | 43  | 57  | 49                | 8                 |
| NF     | FL UVA 340 nm   | 0          | 4   | 96  | 51                | 45                |
| NF     | FL UVA 350 nm   | 0          | 1   | 99  | 44                | 55                |
| NF     | FL UVA 368 nm   | 0          | 0   | 100 | 0                 | 100               |
| NF     | LED UVA 365 nm  | 0          | 0   | 100 | 0                 | 100               |
| CA     | FL UVB 313 nm P | 0          | 42  | 58  | 51                | 7                 |
| CA     | FL UVB 313 nm Q | 0          | 38  | 62  | 53                | 9                 |
| CA     | FL UVA 340 nm   | 0          | 4   | 96  | 51                | 46                |
| CA     | FL UVA 350 nm   | 0          | 1   | 99  | 44                | 55                |
| CA     | FL UVA 368 nm   | 0          | 0   | 100 | 0                 | 100               |
| CA     | LED UVA 365 nm  | 0          | 0   | 100 | 0                 | 100               |
| PET    | FL UVB 313 nm P | 0          | 2   | 98  | 80                | 17                |
| PET    | FL UVB 313 nm Q | 0          | 2   | 98  | 79                | 19                |
| PET    | FL UVA 340 nm   | 0          | 0   | 100 | 48                | 52                |
| PET    | FL UVA 350 nm   | 0          | 0   | 100 | 41                | 59                |
| PET    | FL UVA 368 nm   | 0          | 0   | 100 | 0                 | 100               |
| PET    | LED UVA 365 nm  | 0          | 0   | 100 | 0                 | 100               |

**Supplemental Figure S1.** Commonly used UV light sources. The measured emission spectrum of four types of light sources was convoluted with the transmittance spectra of two types of filters typically used with them. Lamps: UV-B fluorescent tubes (*FL UVB 313 nm Q*: Q-Panel UVB-313, 40W T12, Q-Lab, and *FL UVB 313 nm P*: TL12, 40W T12, Philips), UV-A fluorescent tubes (*FL UVA 340 nm*: Q-Panel UVA-340, Q-Lab; *FL UV-A 350 nm*: UV-A BLB, “similar to older F40 BLB”, Light Sources, Inc.; *FL UV-A 368 nm*: TLD 36W/108 BLB, Philips), UV-A LED, nominal peak at 365 nm (LZ1-10UV00, Osram/Led Engin). Filters: CA, cellulose diacetate (0.115 mm thick, Courtaulds), PET, polyester (0.125 mm thick, Autostat CT-5, McDermit). The table shows photon ratios describing the proportion of the total UV photon irradiance contributed by waveband: UV short  $\lambda < 293$  nm; UV  $\lambda = 250$ –400 nm; UV-B  $\lambda = 280$ –315 nm; UV-A<sub>sw</sub>  $\lambda = 315$ –350 nm; and UV-A<sub>lw</sub>  $\lambda = 350$ –400 nm. All spectra are scaled to equal UV-A ( $\lambda = 315$ –400 nm) photon irradiance of one. Computations were done using functions and spectral data from packages in the R for photobiology suite (Aphalo, 2015).

#### Literature Cited

**Aphalo PJ** (2015) The r4photobiology suite: spectral irradiance. *UV4Plants Bull* **2015** (1): 21–29  
DOI: <https://doi.org/10.19232/uv4pb.2015.1.14>
